# Supplementary material for: Comparative Physio-Biochemical and Transcriptome Analyses Reveal Contrasting Responses to Magnesium Imbalances in Leaves of Mulberry (Morus alba L.) Plants
Source: MDPI journal article supplement (doi:10.3390/antiox13050516), 2024-04-25
Supplement: s1 [file s1]

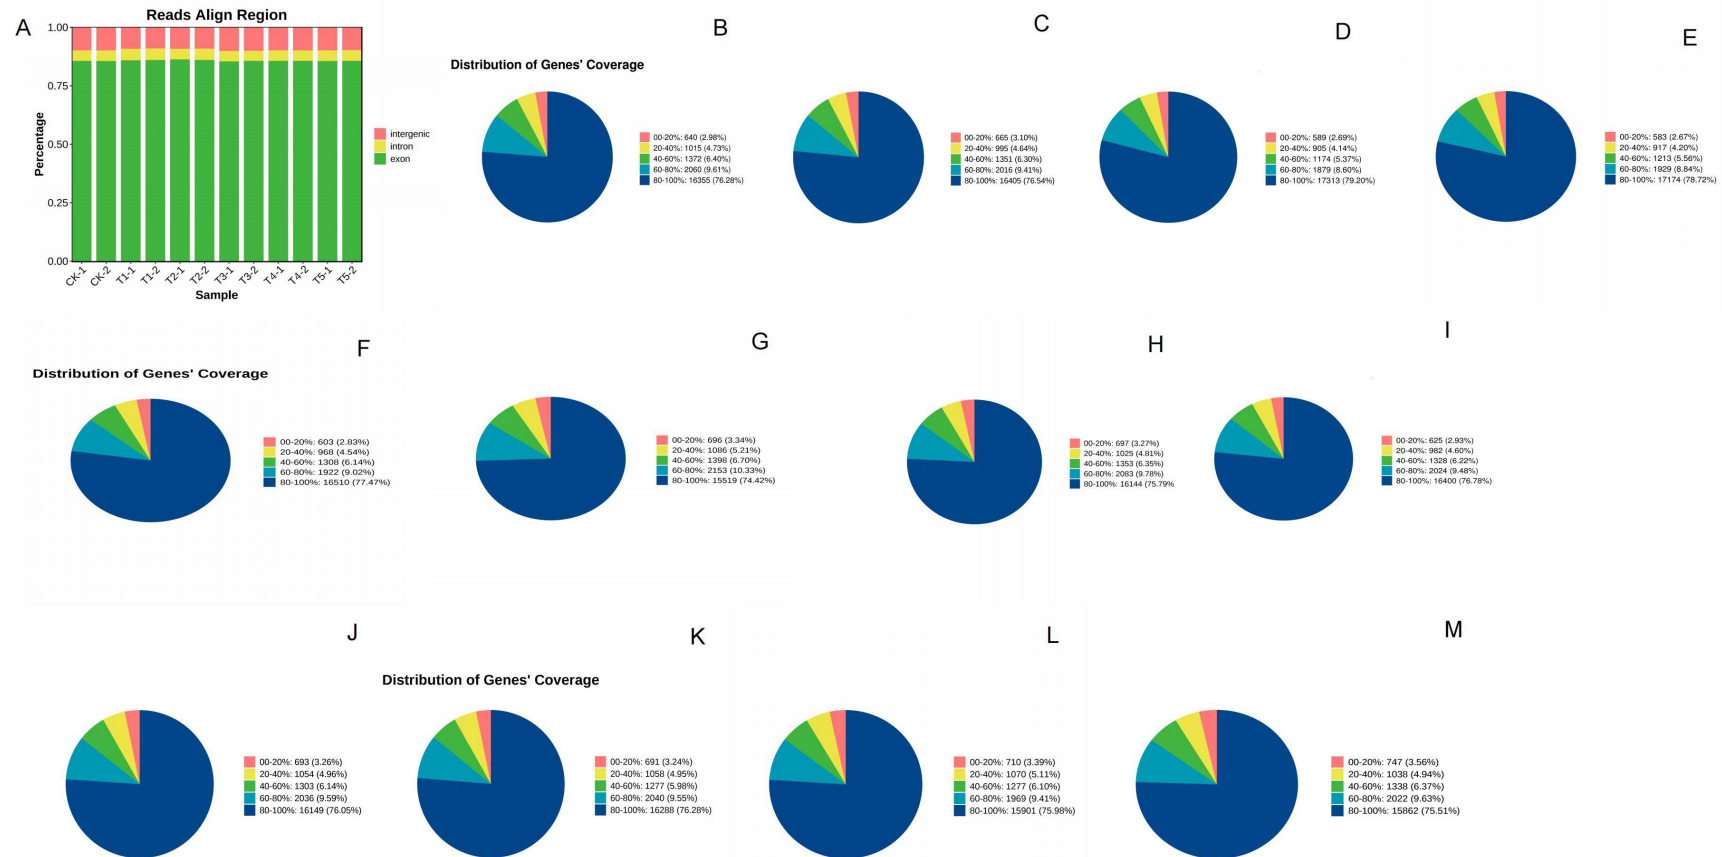

**Figure S1.** (A) alignment of the sample's clean reads to the reference genome. (B, C) genes coverage distribution in CK-1, CK-2. (D, E) genes coverage distribution in T1-1, T1-2. (F, G) genes coverage distribution in T2-1, T2-2. (H, I) genes coverage distribution in T3-1, T3-2. (J, K) genes coverage distribution in T4-1, T4-2. (L, M) genes coverage distribution in T5-1, T5-2. Mg sufficiency (CK; 3 mM), deficiency (T1; 0 mM), low (T2; 1 mM) moderate low (T3; 2 mM) toxicity (T4; 6 mM) and high toxicity (T5; 9 mM).

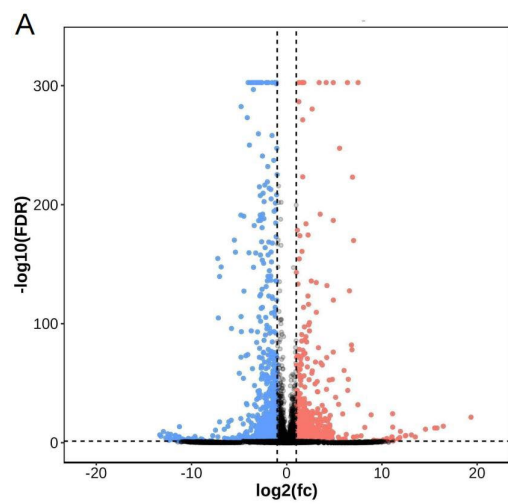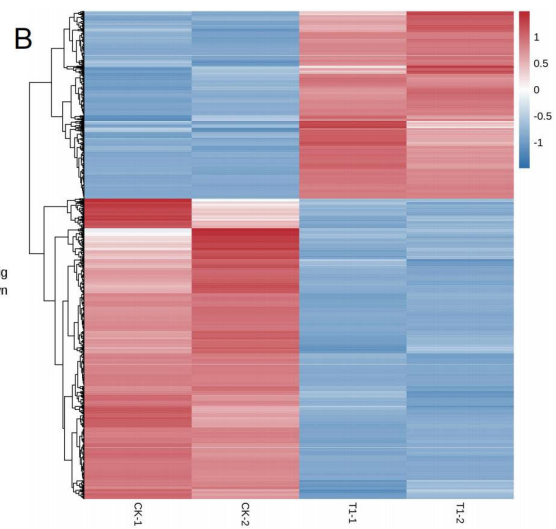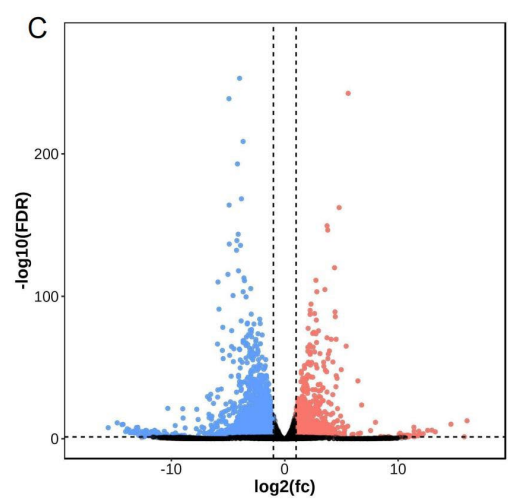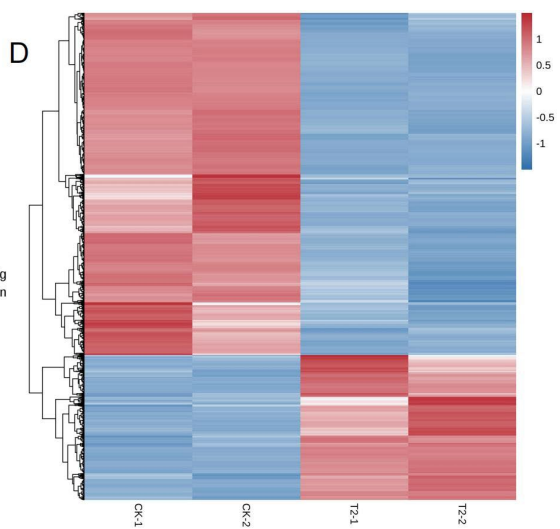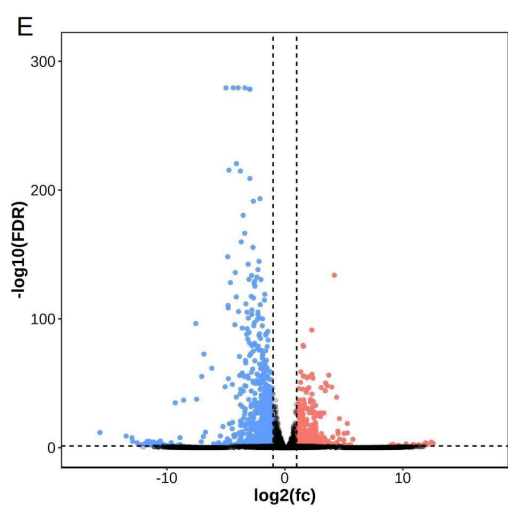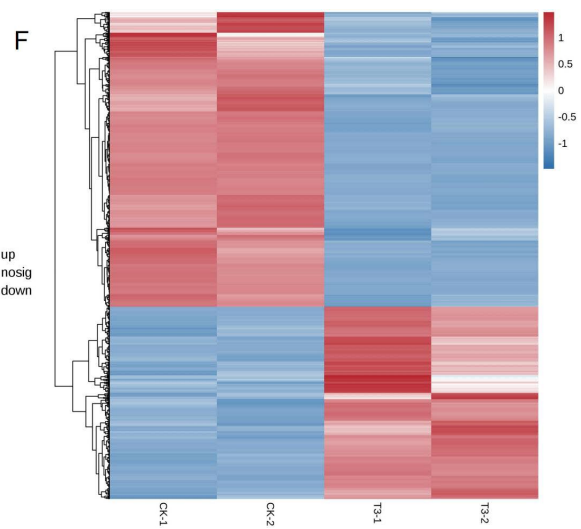

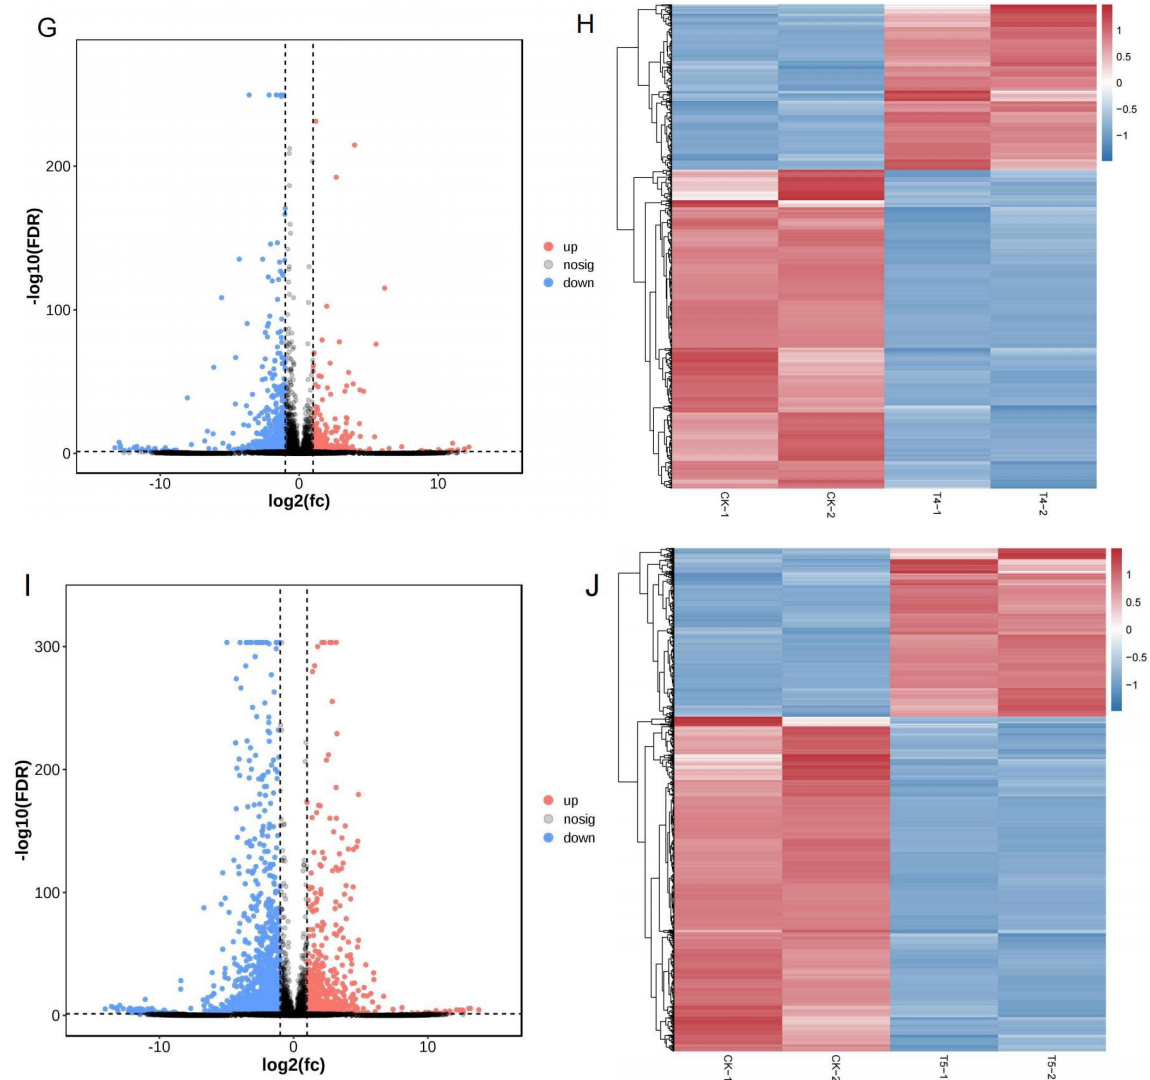

**Figure S2.** Volcano plot and heatmap showing the distribution of the differentially expressed genes (DEGs) in T1 (A, B), T2 (C, D), T3 (E, F), T4 (G, H) and T5 (I, J). Red and blue colors represent genes with higher and lower concentrations, respectively.

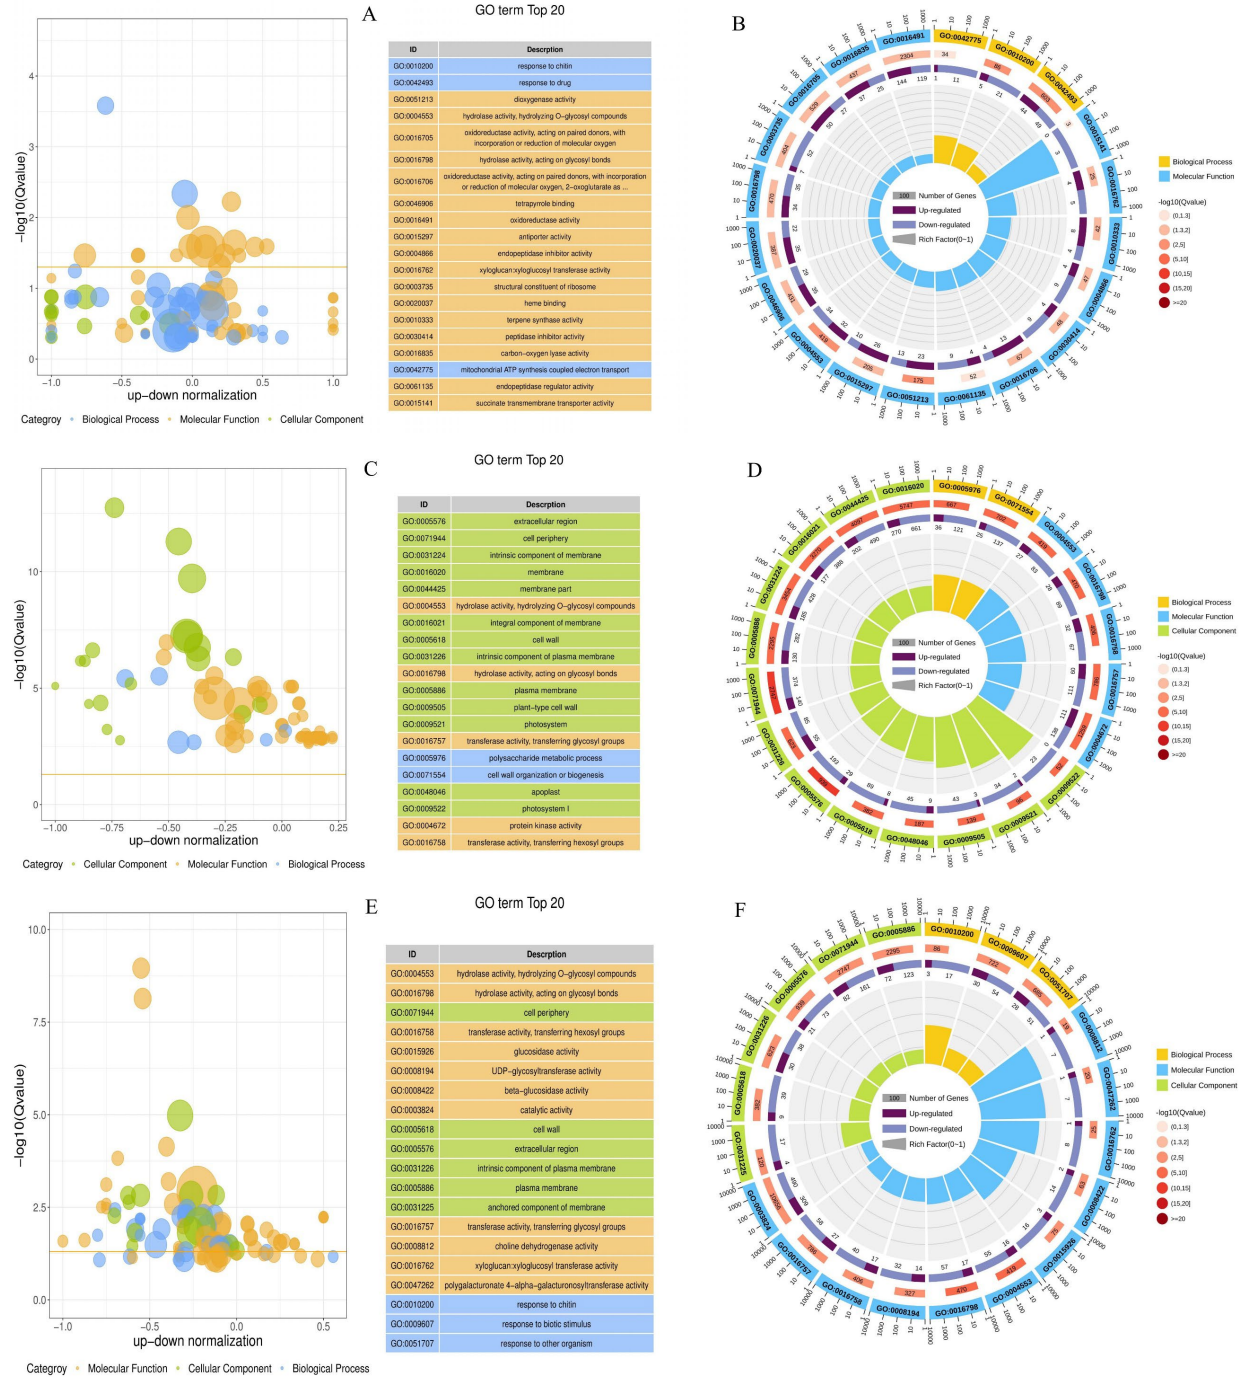

**Figure S3.** Gene Ontology (GO) enrichment results of the DEGs in deficiency and low Mg treatments based on q-value <0.05. (b) and enrichment factor. (A, B) Top 20 GO enrichment in T1. (C, D) Top 20 GO enrichment in T2. (E, F) Top 20 GO enrichment in T3.

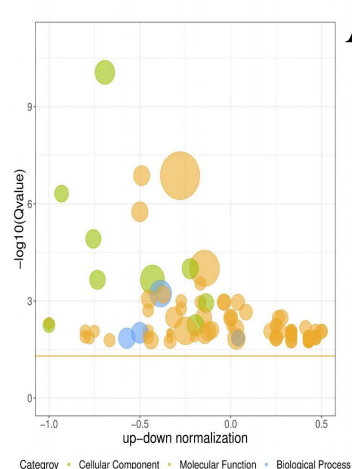

**A**

GO term Top 20

| ID         | Description                                          |
|------------|------------------------------------------------------|
| GO:0005576 | extracellular region                                 |
| GO:0003824 | catalytic activity                                   |
| GO:0004553 | hydrolase activity, hydrolyzing O-glycosyl compounds |
| GO:0048046 | apoptosis                                            |
| GO:0016798 | hydrolase activity, acting on glycosyl bonds         |
| GO:0005618 | cell wall                                            |
| GO:0016740 | transferase activity                                 |
| GO:0031226 | intrinsic component of plasma membrane               |
| GO:0071944 | cell periphery                                       |
| GO:0030312 | external encapsulating structure                     |
| GO:0030414 | peptidase inhibitor activity                         |
| GO:0005975 | carbohydrate metabolic process                       |
| GO:0008194 | UDP-glycosyltransferase activity                     |
| GO:0016758 | transferase activity, transferring hexosyl groups    |
| GO:0004866 | endopeptidase inhibitor activity                     |
| GO:0015144 | carbohydrate transmembrane transporter activity      |
| GO:1901478 | carbohydrate transporter activity                    |
| GO:0061134 | peptidase regulator activity                         |
| GO:0051119 | sugar transmembrane transporter activity             |
| GO:0005887 | integral component of plasma membrane                |

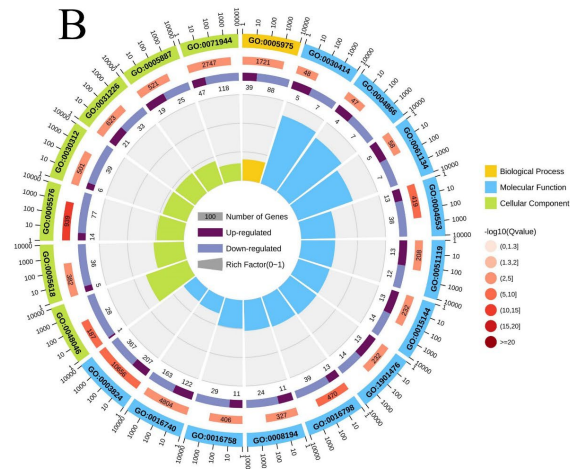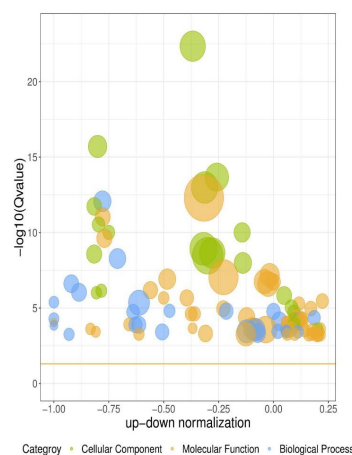

**C**

GO term Top 20

| ID         | Description                                          |
|------------|------------------------------------------------------|
| GO:0071944 | cell periphery                                       |
| GO:0005576 | extracellular region                                 |
| GO:0005686 | plasma membrane                                      |
| GO:0031224 | intrinsic component of membrane                      |
| GO:0003824 | catalytic activity                                   |
| GO:0071554 | cell wall organization or biogenesis                 |
| GO:0005618 | cell wall                                            |
| GO:0004553 | hydrolase activity, hydrolyzing O-glycosyl compounds |
| GO:0048046 | apoptosis                                            |
| GO:0005055 | plant-type cell wall                                 |
| GO:0031226 | intrinsic component of plasma membrane               |
| GO:0016798 | hydrolase activity, acting on glycosyl bonds         |
| GO:0044425 | membrane part                                        |
| GO:0016021 | integral component of membrane                       |
| GO:0030312 | external encapsulating structure                     |
| GO:0016020 | membrane                                             |
| GO:0005978 | polysaccharide metabolic process                     |
| GO:0044459 | plasma membrane part                                 |
| GO:0004672 | protein kinase activity                              |
| GO:0016740 | transferase activity                                 |

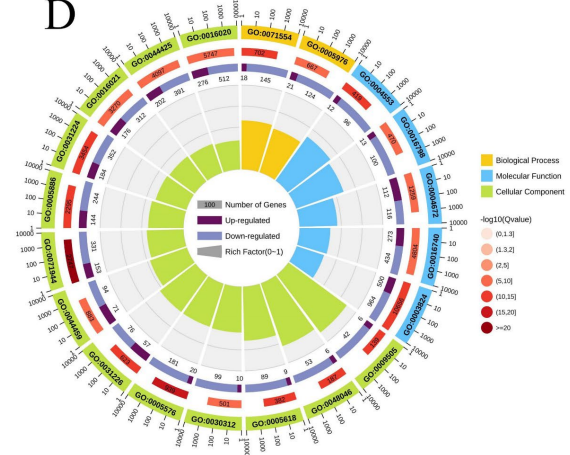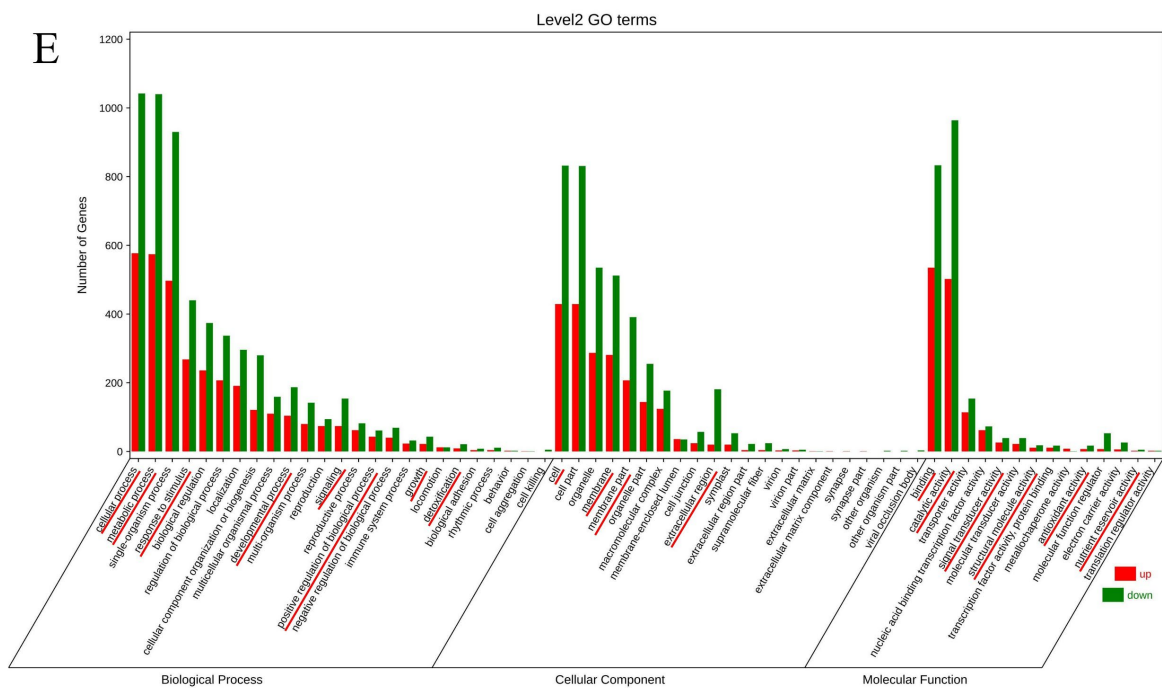



**Figure S4.** Gene Ontology (GO) enrichment results of the DEGs Mg toxicity treatments based on q-value <0.05. (b) and enrichment factor. (A, B) Top 20 GO enrichment in T4. (C, D) Top 20 GO enrichment in T5. (E) GO term secondary classification involving the DEGs

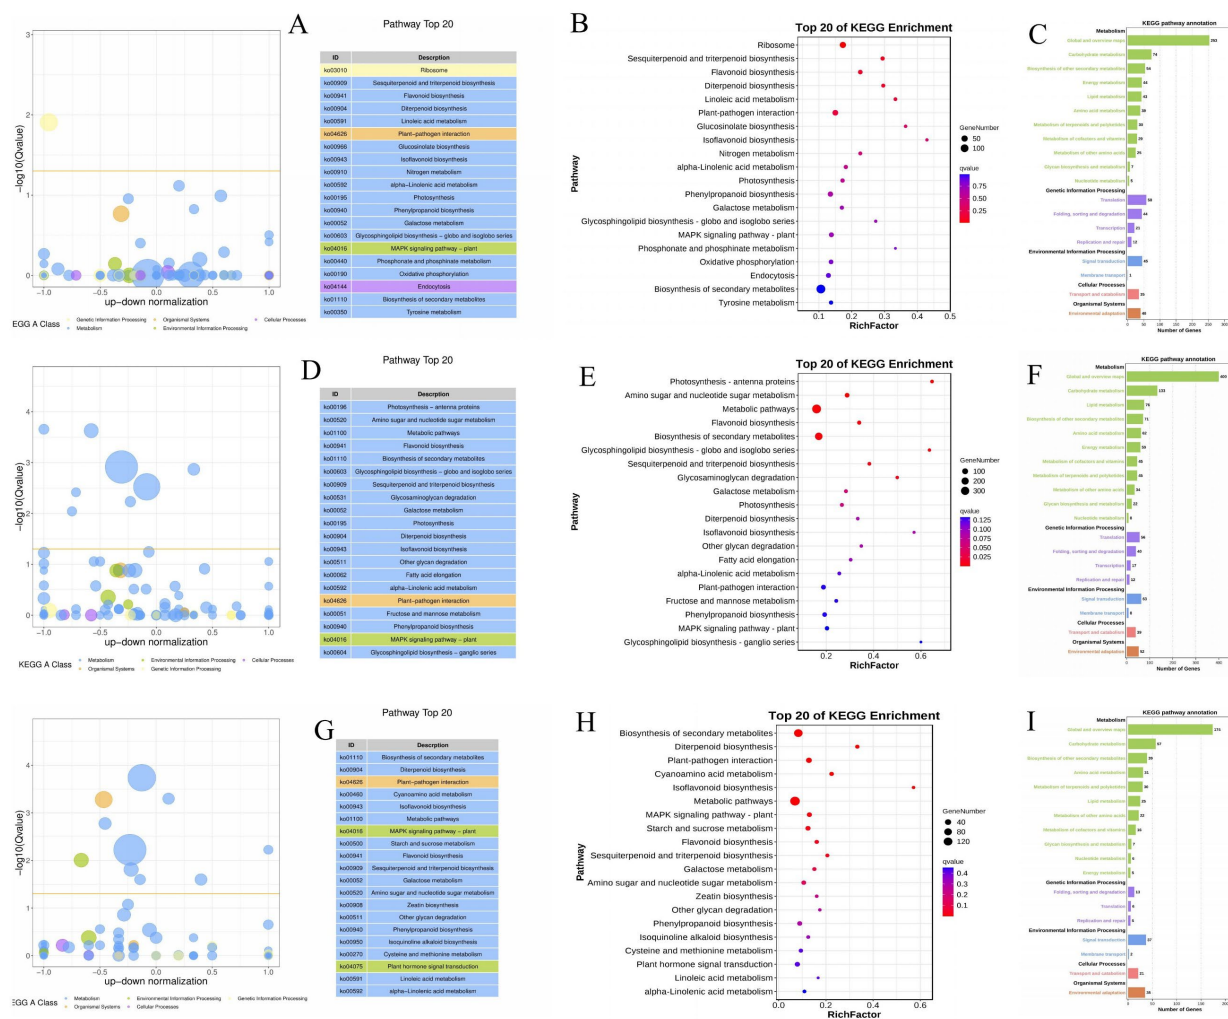

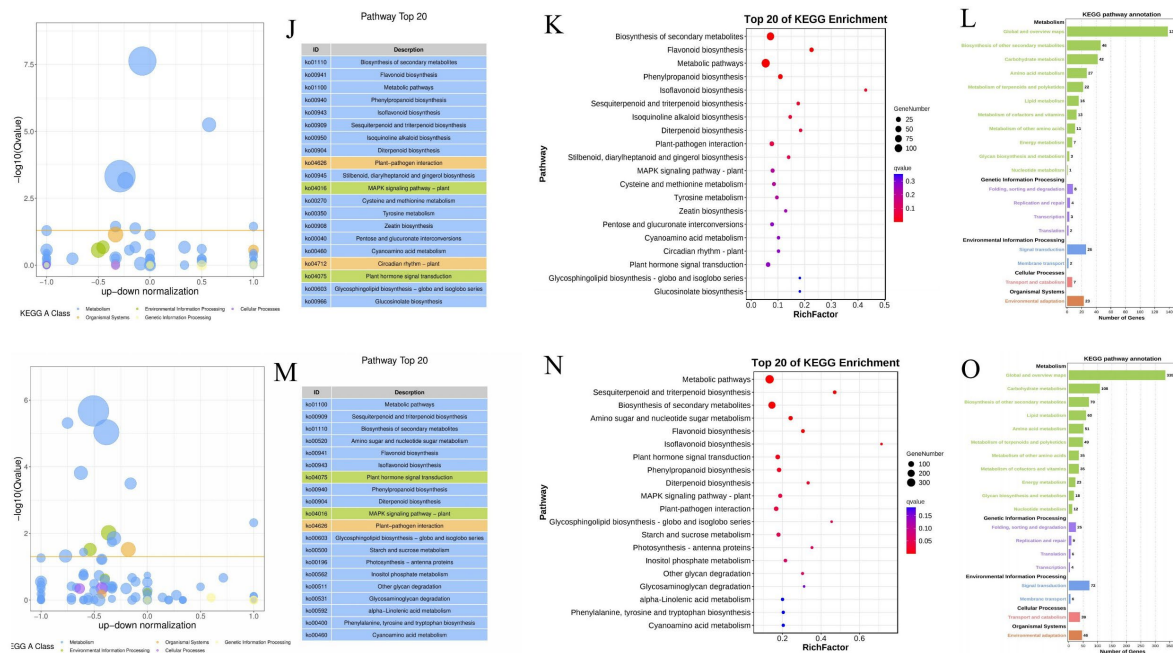

**Figure S5.** KEGG enrichment analysis of the DEGs across Mg-deficiency and Mg supply treatments. Rich Factor represents the ratio between the number of DEGs mapped to a certain pathway and total number of genes mapped to the corresponding pathway. (A-C) KEGG pathways that are significantly enriched based on q-value ( $FDR \leq 0.05$ ) in T1. (D-F) KEGG pathways in T2. (G-I) KEGG pathways in T3. (J-L) KEGG pathways in T4. (M-O) KEGG pathways in T5.
